# Supplementary material
Source: Springer Nature journal article supplement (https://www.springermedizin.de/resource/supplementary/13012_2012_645_MOESM6_ESM.pdf/9630446)

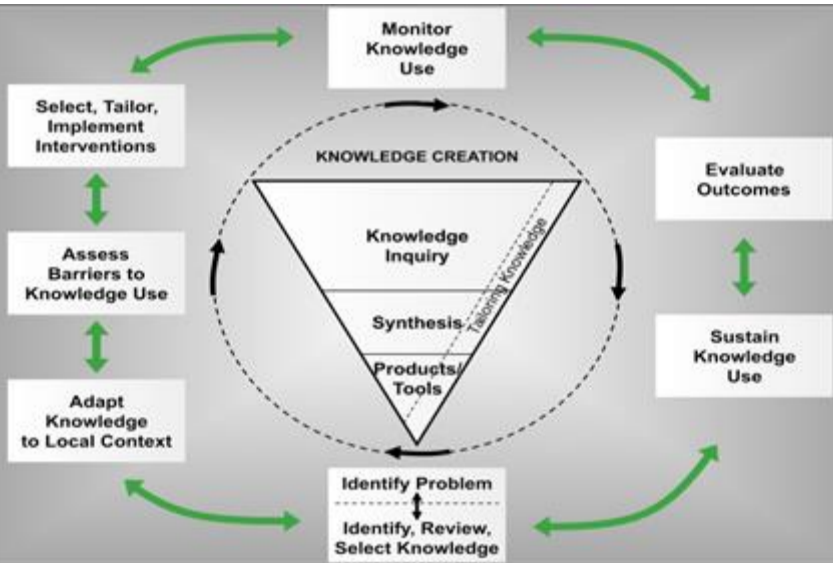

Supplement: MOESM6 [file 9630446]
